# Supplementary material
Source: PubMed Central journal article supplement (PMC2694973)
Supplement: mmc1.pdf [file mmc1.pdf]

## Supplemental Data

### Copy-Number Mutations on Chromosome 17q24.2-q24.3

### in Congenital Generalized Hypertrichosis Terminalis

### with or without Gingival Hyperplasia

Miao Sun, Ning Li, Wu Dong, Zugen Chen, Qing Liu, Yiming Xu, Guang He, Yongyong Shi, Xin Li, Jiajie Hao, Yang Luo, Dandan Shang, Dan Lv, Fen Ma, Dai Zhang, Rui Hua, Chaoxia Lu, Yaran Wen, Lihua Cao, Alan D. Irvine, W. H. Irwin McLean, Qi Dong, Ming-Rong Wang, Jun Yu, Lin He, Wilson H. Y. Lo, and Xue Zhang

**Table S1. Primers for two-point linkage analysis**

| Amplicon | Primer Sequence (5'-3')  |                           | Amplicon Position |          |
|----------|--------------------------|---------------------------|-------------------|----------|
|          | Forward                  | Reverse                   | Start*            | Stop*    |
| D17S789  | CTGCATACGAAGGGTAGGAC     | ACTCCAAATCAAGTTTGTACTGAGA | 64140160          | 64140315 |
| D17S795  | TGAGTTGTTAGCAATACTCGTAGG | TTTTCATGCGCTATCTCCAG      | 64189799          | 64189903 |
| D17S2182 | CAGGGGAGAGCAAAGCTGTATT   | TCTGGACAGGTTATTATACTGGG   | 64651512          | 64651725 |
| D17S1786 | GAGACTCTGTATGGCACCC      | AAACTGGATAACGCCCTG        | 65006332          | 65006492 |
| D17S1295 | TCTAGCCGTTGTGTGGTA       | TTCTCAGACTCTCAGTCTTGG     | 65525564          | 65525782 |
| D17S1534 | TTTGGAGTGAAGTTAAAGA      | ATTTTCAAGTACAGATAAAACTGCC | 67409223          | 67409451 |
| D17S1351 | CCAAAGTCCTAAAGGTGGG      | TTTCAGGCAAATAAGGCAG       | 68183747          | 68183919 |

\* Genomic position of PCR primers corresponding to the March 2006 human genome

reference sequence NCBI Build 36.1

**Table S2. Primers for qPCR assays**

| Amplicon            | Primer Sequence (5'-3')   |                           | Amplicon Position |          |
|---------------------|---------------------------|---------------------------|-------------------|----------|
|                     | Forward                   | Reverse                   | Start*            | Stop*    |
| 1                   | GAGCATTGGGAGAGCATCAGG     | TCAAGGGCATAAGCTCAGCG      | 64258990          | 64259090 |
| 2 ( <i>ABCA8</i> )  | CCTGCCTGCATGGATTTGA       | CCAGATGGAAGCCTCAGGAC      | 64414596          | 64414696 |
| 3 ( <i>ABCA9</i> )  | TGCAGAAGGGTAGAGGCCTG      | CCCAAACCTTCAGCTCTTCAGAAC  | 64515924          | 64516024 |
| 4 ( <i>ABCA6</i> )  | CCATGATGCTCTGAAACAATAACAC | AGATTCAGCATTCTGGTGAGTGAC  | 64641291          | 64641391 |
| 5 ( <i>ABCA10</i> ) | AGCAATTTGACCACAAGCTGTCTT  | TGTTTTCGACTTTGCTTTGCC     | 64735434          | 64735529 |
| 6 ( <i>ABCA5</i> )  | TTAAGCTGACCCTATGTGGGCA    | GTCTCTTTGGCTGTCTATCTTGATC | 64808805          | 64808911 |
| 7 ( <i>MAP2K6</i> ) | GGTTGTCTGGTCACTGAGGTCAC   | CAGGGAACCTGAGACAGGCTAC    | 65042119          | 65042219 |
| 8                   | TGAAACAAAAGTGTGTGTTGGCA   | GGAACAAAAGCTTCTCACCATCTG  | 65272254          | 65272345 |
| 9 ( <i>KCNJ16</i> ) | GCAAAAGATGCATTCAGTAAGCTG  | GGTCCAAGTGGCAAACCTAGTG    | 65641524          | 65641614 |
| 10 ( <i>KCNJ2</i> ) | AGGGAAGATGCCACACCTGG      | TCCCTGCTTTGGCATTTC        | 65685299          | 65685399 |
| 11                  | GAAGCAGCCGTGTAATCCTCC     | CAGGGTGTCTGAGATTCCCATG    | 65747075          | 65747175 |

\* Genomic position of PCR primers corresponding to the March 2006 human genome reference sequence NCBI Build 36.1

**Table S3. Primers for analysis of breakpoint junctions**

| Family | Primer Sequence (5'-3')          |                                  | Position |          |
|--------|----------------------------------|----------------------------------|----------|----------|
|        | Forward                          | Reverse                          | Start*   | Stop*    |
| SY     | GAGTGAGACCATCAGGGTGTGAAAC<br>TGG | GTTGGCTTCCCAATGCGGTAGGATG        | 64340824 | 65305425 |
| GD     | CAAGGGGAATGGTCCATCTTTTGGC        | CTGCATAGGTAATGTGGTGTCTTCCA<br>GG | 64583839 | 65139513 |
| BJ     | CTCCTGTCTCCACACTCTGAGCCTC        | AGACAGGCTGTGCCTTAATCCTCTC        | 64491005 | 65169893 |

\* Genomic position of PCR primers corresponding to the March 2006 human genome reference sequence NCBI Build 36.1

**Table S4. Primers for RT-PCR analysis**

| Gene          | Primer Sequence (5'-3')   |                          | Amplicon Position |          |
|---------------|---------------------------|--------------------------|-------------------|----------|
|               | Forward                   | Reverse                  | Start*            | Stop*    |
| <i>ABCA5</i>  | GCAGCGTTGGCTTGTATTGC      | CTCCTCACAACTGGCAACC      | chr17: 64768976   | 64763913 |
| <i>ABCA6</i>  | GGTCTATGCCCGTAGATGGTTC    | TACTGCCCTCAAGAGAACGTGC   | chr17: 64592019   | 64592876 |
| <i>ABCA10</i> | GTCGGTCTACTTTATGCTCCTTCAG | AGGACAGATCACTGCAATACTTGG | chr17: 64700894   | 64702209 |
| <i>MAP2K6</i> | GGTTGCAAACCATACATGGCC     | GATGCCACATCTGTTCTTTGG    | chr17: 65031357   | 65049461 |
| <i>KRT15</i>  | TCGTGGTTCTTCTTCAGGTAGGC   | GGGTTTTGGTGGTGGCTTTG     | chr17: 36926590   | 36928345 |
| <i>ACTB</i>   | GTAGTTTCGTGGATGCCACAGG    | TACAATGAGCTGCGTGTGGCT    | chr7: 5534312     | 5535410  |

\* Genomic position of PCR primers corresponding to the March 2006 human genome reference sequence NCBI Build 36.1

**Table S5. Two-point LOD scores for markers on chromosome 17q24.2-q24.3**

| Marker          | $\theta =$  |              |             |             |             |             |             |
|-----------------|-------------|--------------|-------------|-------------|-------------|-------------|-------------|
|                 | 0.00        | 0.01         | 0.05        | 0.10        | 0.20        | 0.30        | 0.40        |
| <b>D17S789</b>  | $-\infty$   | <b>0.08</b>  | <b>0.67</b> | <b>0.83</b> | <b>0.83</b> | <b>0.65</b> | <b>0.38</b> |
| <b>D17S795</b>  | $-\infty$   | <b>1.56</b>  | <b>2.04</b> | <b>2.06</b> | <b>1.75</b> | <b>1.23</b> | <b>0.59</b> |
| <b>D17S2182</b> | <b>3.91</b> | <b>3.85</b>  | <b>3.60</b> | <b>3.27</b> | <b>2.56</b> | <b>1.75</b> | <b>0.84</b> |
| <b>D17S1786</b> | <b>3.91</b> | <b>3.85</b>  | <b>3.60</b> | <b>3.27</b> | <b>2.56</b> | <b>1.75</b> | <b>0.84</b> |
| <b>D17S1295</b> | <b>2.41</b> | <b>2.37</b>  | <b>2.21</b> | <b>2.00</b> | <b>1.54</b> | <b>1.02</b> | <b>0.45</b> |
| <b>D17S1534</b> | <b>3.15</b> | <b>3.10</b>  | <b>2.86</b> | <b>2.56</b> | <b>1.91</b> | <b>1.19</b> | <b>0.47</b> |
| <b>D17S1351</b> | $-\infty$   | <b>-0.14</b> | <b>1.04</b> | <b>1.36</b> | <b>1.35</b> | <b>1.01</b> | <b>0.49</b> |

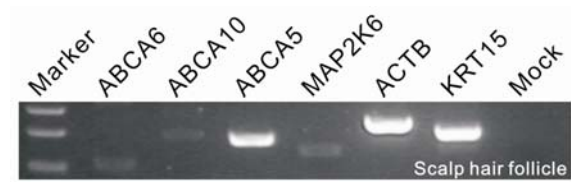

**Figure S1. Expression of mRNA for *ABCA5*, *ABCA6*, *ABCA10*, *MAP2K6* and control genes in human scalp hair follicles.**

Marker: DL2,000 DNA marker (TaKaRa); *ACTB*: the  $\beta$ -actin house keeping gene; *KRT15*: the keratin 15 gene expressed in the hair follicle stem cells. Mock: negative control.
